# Supplementary material for: Mesoscopic mass transport effects in electrocatalytic processes
Source: Royal Society of Chemistry journal article supplement (doi:10.1039/b806437g), 2008-08-08
Supplement: b806437g.pdf [file b806437g.pdf]

**Supplementary Material**

Table S1. Collection efficiencies ( $N = I_{\text{coll}} / I_{\text{gen}}$ ) for hydrogen evolution at the generator ( $I_{\text{gen}}$ ) electrode (potential-step from 0.31 to 0.03 V) with simultaneous oxidation of the produced hydrogen at the pc-Pt collector ( $I_{\text{coll}}$ ) biased at 0.3 V, as a function of the electrolyte flow rate.

| Working electrode (generator) | Electrolyte flow rate ( $\mu\text{l s}^{-1}$ ) |      |      |
|-------------------------------|------------------------------------------------|------|------|
|                               | 1                                              | 10   | 30   |
| pc-Pt                         | 0.56                                           | 0.71 | 0.44 |
| <i>HCL-20</i>                 | 0.62                                           | 0.7  | 0.49 |
| <i>HCL-10</i>                 | 0.76                                           | 0.81 | 0.43 |
| <i>HCL-01</i>                 | --                                             | 0.71 | 0.53 |
| GC                            | --                                             | 0.75 | 0.37 |
